# Supplementary material for: Evaluation of low-dose aspirin in the prevention of recurrent spontaneous preterm labour (the APRIL study): A multicentre, randomised, double-blinded, placebo-controlled trial
Source: PLOS journal article supplement (doi:10.1371/journal.pmed.1003892), 2022-02-01
Supplement: S4 (10.1371/journal.pmed.1003892.s004) [file journal.pmed.1003892.s004]

**Table S3** Additional neonatal outcomes according to treatment group

|                                                            | <b>Aspirin</b>     | <b>Placebo</b>     |
|------------------------------------------------------------|--------------------|--------------------|
|                                                            | <b>(n = 194)</b>   | <b>(n = 193)</b>   |
| Number of days on ventilation support (intubation or CPAP) | 0.95 ( $\pm 5.2$ ) | 0.82 ( $\pm 5.9$ ) |
| IRDS requiring surfactant therapy                          | 5 (2.6%)           | 7 (3.6%)           |
| Patent ductus arteriosus (PDA) requiring treatment         | 1 (0.5%)           | 2 (1.0%)           |
| Hypotension requiring inotropics                           | 1 (0.5%)           | 2 (1.0%)           |
| Intestinal perforation                                     | 0 (0%)             | 0 (0%)             |
| Convulsions                                                | 0 (0%)             | 0 (0%)             |
| Asphyxia                                                   | 4 (2.1%)           | 1 (0.5%)           |
| Pneumothorax/pneumomediastinum                             | 0 (0%)             | 3 (1.6%)           |
| Early onset neonatal sepsis, culture proven                | 0 (0%)             | 2 (1.0%)           |
| Late onset neonatal sepsis, culture proven                 | 4 (2.1%)           | 1 (0.5%)           |
| Neonatal meningitis                                        | 0 (0%)             | 0 (0%)             |
| Cerebellar bleeding                                        | 1 (0.5%)           | 0 (0%)             |
| Cephalic hematoma                                          | 1 (0.5%)           | 0 (0%)             |
| Other cerebral bleeding <sup>a</sup>                       | 4 (2.1%)           | 0 (0%)             |
| Gastrointestinal bleeding                                  | 0 (0%)             | 0 (0%)             |
| Lung bleeding                                              | 0 (0%)             | 0 (0%)             |
| Other bleeding                                             | 0 (0%)             | 0 (0%)             |

<sup>a</sup> 3 germinal matrix hematomas, 1 possible epidural bleed (or artefact from cephalic hematoma)
